# Supplementary material for: Insights into the distribution and abundance of the ubiquitous Candidatus Saccharibacteria phylum following tag pyrosequencing
Source: PubMed Central journal article supplement — Sci Rep. 2014 Feb 4;4:3957. doi: 10.1038/srep03957 (PMC5379237; doi:10.1038/srep03957), 2014-02-04
Supplement: srep03957-s1.pdf [file srep03957-s1.pdf]

**Insights into the distribution and abundance of the ubiquitous Candidatus  
Saccharibacteria phylum following tag pyrosequencing**

Belinda Ferrari<sup>1</sup> #, Tristrom Winsley<sup>1</sup>, Mukan Ji<sup>1</sup> and Brett Neilan<sup>1</sup>

1. School of Biotechnology and Biomolecular Sciences, University of New South  
Wales, Randwick, NSW, 2052, Australia.

# Corresponding author:

Dr Belinda C Ferrari, School of Biotechnology and Biomolecular Sciences, University  
of New South Wales, Randwick, NSW, 2052, Australia.

Tel: +612 9385 2032, Fax: +612 9385 1483

Email: [b.ferrari@unsw.edu.au](mailto:b.ferrari@unsw.edu.au)

1

2

3 **Figure S1. Maximum-likelihood circular cladogram of the Candidatus**

4 **Saccharibacteria phylum.**

5 This similarity tree was constructed with 229 new sequences (OTUs defined at 0.08  
6 dissimilarity), as well as 46 sequences from GreenGenes  
7 representing previously defined class level clades 1, 3, MJK10 and the outgroup  
8 species, *E. albertii* str. 19982 (AY696662), *B. acidicola* str. TSAS-  
9 1(GQ389780) and *A. catuli* str. CCUG 41709 (AJ276805). The reference  
10 sequences from GreenGenes were prefixed with the subdivision affiliation assigned  
11 by the GreenGenes taxonomy; Subdivision 1 (Dark Green), Subdivision 3 (Light  
12 Green), Class MJK10 (Orange), or unclassified class (Dark Green). The sequences  
13 obtained in this study (229) are colored according to their source, soil (brown),  
14 sponge (blue), seal gut (grey), human (pink). The branches of the trees are colored  
15 according to the 4 proposed clades; 1 (dark green), 2 (blue), 3 (light green), 4 (red).  
16 Bootstrap confidence was calculated from 1000 replicates and displayed by  
17 diamonds at each node. The color of the diamonds, ranging from white to black  
18 corresponds to the bootstrap confidence values (between 50 and 100%). The image  
19 was produced with Figtree software v1.4.0 (<http://tree.bio.ed.ac.uk/software/figtree/>)  
20 from a newick file generated by FastTree software.

21

22

23

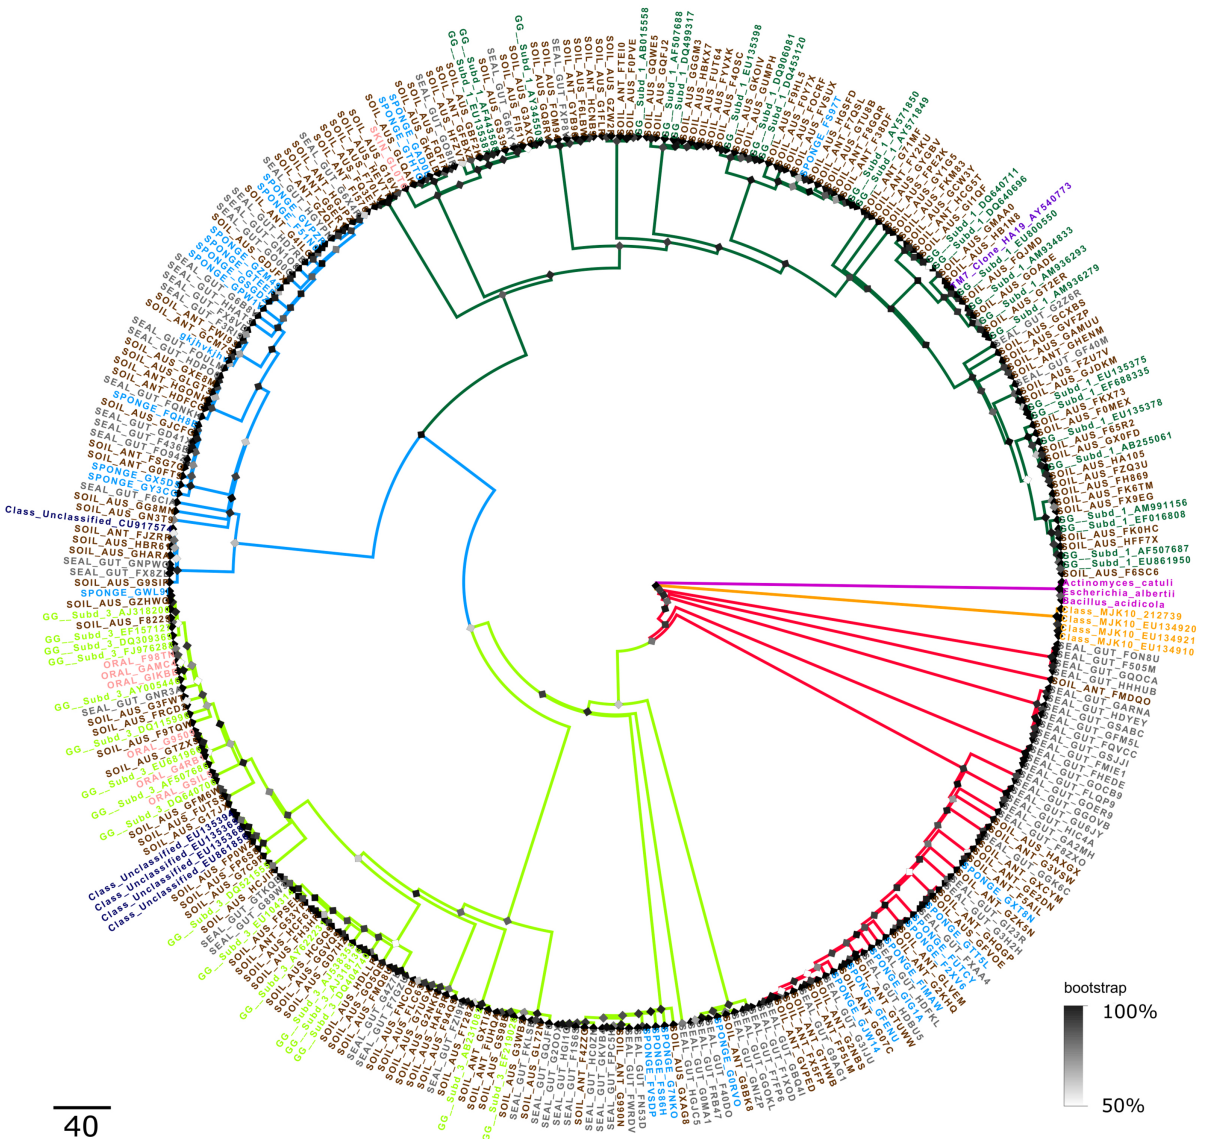

24  
25  
26  
27  
28  
29  
30  
31  
32  
33  
34

40

35 **Table S1. DNA Sample Description**

| <b>Sample</b> | <b>Sample Type</b> | <b>Sample Source</b>                                          | <b>DNA extraction method</b> |
|---------------|--------------------|---------------------------------------------------------------|------------------------------|
| 1             | Marine Sponge      | Botany Bay, NSW, Australia                                    | FastDNA spin Kit             |
| 2             | Marine Sponge      | Botany Bay, NSW, Australia                                    | FastDNA spin Kit             |
| 3             | Marine Sponge      | Botany Bay, NSW, Australia                                    | FastDNA spin Kit             |
| 4             | Marine Sponge      | Botany Bay, NSW, Australia                                    | FastDNA spin Kit             |
| 5             | Marine Sponge      | Botany Bay, NSW, Australia                                    | FastDNA spin Kit             |
| 7             | Marine Sponge      | Great Barrier Reef, QLD, Australia                            | FastDNA spin Kit             |
| 8             | Marine Sponge      | Great Barrier Reef, QLD, Australia                            | FastDNA spin Kit             |
| 9             | Marine Sponge      | Great Barrier Reef, QLD, Australia                            | FastDNA spin Kit             |
| 10            | Marine Sponge      | Great Barrier Reef, QLD, Australia                            | FastDNA spin Kit             |
| 11            | Marine Sponge      | Great Barrier Reef, QLD, Australia                            | FastDNA spin Kit             |
| 13            | Marine Sponge      | Great Barrier Reef, QLD, Australia                            | FastDNA spin Kit             |
| 14            | Marine Sponge      | Great Barrier Reef, QLD, Australia                            | FastDNA spin Kit             |
| 17            | Soil               | Pagewood, NSW, Australia                                      | FastDNA spin Kit             |
| 18            | Soil               | Pulya Pulya Dam, NT, Australia                                | FastDNA spin Kit             |
| 19            | Soil               | Eastlakes, NSW, Australia                                     | FastDNA spin Kit             |
| 20            | Soil               | UNSW Australia, NSW, Australia                                | FastDNA spin Kit             |
| 21            | Soil               | UNSW Australia, NSW, Australia                                | FastDNA spin Kit             |
| 22            | Soil               | UNSW Australia, NSW, Australia                                | FastDNA spin Kit             |
| 23            | Soil               | Macquarie University, NSW, Australia                          | FastDNA spin Kit             |
| 24            | Polar soil         | Herring Island, Antarctica                                    | FastDNA spin Kit             |
| 25            | Polar soil         | Herring Island, Antarctica                                    | FastDNA spin Kit             |
| 26            | Polar soil         | Casey Station, Antarctica                                     | FastDNA spin Kit             |
| 27            | Polar soil         | Casey Station, Antarctica                                     | FastDNA spin Kit             |
| 28            | Seal faeces        | Leopard seal, Danco Coast, WA, Australia                      | QIAamp stool kit             |
| 29            | Seal faeces        | Leopard seal, Danco Coast, WA, Australia                      | QIAamp stool kit             |
| 30            | Seal faeces        | Southern elephant seal, South Shetland Islands, WA, Australia | QIAamp stool kit             |
| 31            | Seal faeces        | Captive leopard seal, Taronga Zoo, NSW, Australia             | QIAamp stool kit             |

|           |             |                                                             |                    |
|-----------|-------------|-------------------------------------------------------------|--------------------|
| <b>32</b> | Seal faeces | Southern elephant seal, Taronga Zoo, Sydney, NSW, Australia | QIAamp stool kit   |
| <b>34</b> | Seal faeces | Southern elephant seal, Taronga Zoo, Sydney, NSW, Australia | QIAamp stool kit   |
| <b>35</b> | Human oral  | Extracted teeth; Sydney, NSW, Australia                     | prepGEM tissue kit |
| <b>37</b> | Human oral  | Extracted teeth; Sydney, NSW, Australia                     | prepGEM tissue kit |
| <b>38</b> | Human oral  | Extracted teeth; Sydney, NSW, Australia                     | prepGEM tissue kit |
| <b>39</b> | Human oral  | Extracted teeth; Sydney, NSW, Australia                     | prepGEM tissue kit |
| <b>40</b> | Human skin  | Sydney, NSW, Australia                                      | prepGEM tissue kit |

36

37

38

39 **Table S2. PCR primer sequences targeting Saccharibacteria and *in silico* matches is RDP.**  
 40 Number of matches to accessions in each phylum in the RDP Release 10 Update 28. Included are  
 41 published primers that target the Candidate Division (Hugenholtz *et al.*, 2001; Brinig, *et al.*, 2003) as  
 42 well as the 4 taxon-specific primers designed in this study.

43  
 44

| Phylum                                       | Number of Accessions | Hugenholtz <i>et al.</i> , 2001 |          | Brinig <i>et al.</i> , 2003 |           |           | This study |          |          |          |
|----------------------------------------------|----------------------|---------------------------------|----------|-----------------------------|-----------|-----------|------------|----------|----------|----------|
|                                              |                      | TM7-314F                        | TM7-580F | TM7-910F                    | TM7-1093F | TM7-1177R | TM7-211F   | TM7-686R | TM7-590F | TM7-965R |
| <i>Actinobacteria</i>                        | 187010               | 0                               | 2        | 1                           | 0         | 0         | 1          | 2        | 2        | 1        |
| <i>Aquificae</i>                             | 907                  | 0                               | 0        | 0                           | 0         | 0         | 0          | 0        | 0        | 0        |
| <i>Bacteroidetes</i>                         | 88998                | 5                               | 0        | 0                           | 9         | 76        | 3          | 1        | 1        | 0        |
| <i>Caldiserica</i>                           | 53                   | 0                               | 0        | 0                           | 0         | 0         | 0          | 0        | 0        | 0        |
| <i>Chlamydiae</i>                            | 361                  | 0                               | 0        | 0                           | 0         | 0         | 0          | 0        | 0        | 0        |
| <i>Chlorobi</i>                              | 809                  | 1                               | 0        | 0                           | 0         | 0         | 0          | 0        | 0        | 0        |
| <i>Chloroflexi</i>                           | 5505                 | 123                             | 0        | 0                           | 0         | 14        | 3          | 0        | 0        | 0        |
| <i>Chrysiogenetes</i>                        | 9                    | 0                               | 0        | 0                           | 0         | 0         | 0          | 0        | 0        | 0        |
| <i>Deferribacteres</i>                       | 287                  | 0                               | 0        | 0                           | 0         | 0         | 0          | 0        | 0        | 0        |
| <i>Deinococcus-Thermus</i>                   | 1329                 | 0                               | 0        | 0                           | 0         | 0         | 0          | 0        | 0        | 0        |
| <i>Dictyoglomi</i>                           | 22                   | 0                               | 0        | 0                           | 0         | 0         | 0          | 0        | 0        | 0        |
| <i>Elusimicrobia</i>                         | 139                  | 0                               | 0        | 0                           | 0         | 0         | 0          | 0        | 0        | 0        |
| <i>Fibrobacteres</i>                         | 256                  | 0                               | 0        | 0                           | 0         | 0         | 0          | 0        | 0        | 0        |
| <i>Fusobacteria</i>                          | 4659                 | 1                               | 0        | 0                           | 0         | 0         | 1          | 0        | 0        | 0        |
| <i>Gemmatimonadetes</i>                      | 1025                 | 0                               | 0        | 0                           | 0         | 0         | 0          | 0        | 0        | 0        |
| <i>Lentisphaerae</i>                         | 224                  | 0                               | 0        | 0                           | 0         | 0         | 0          | 0        | 0        | 0        |
| <i>Nitrospira</i>                            | 1064                 | 0                               | 0        | 0                           | 0         | 0         | 0          | 0        | 0        | 0        |
| <i>Planctomycetes</i>                        | 4142                 | 0                               | 0        | 0                           | 0         | 0         | 1          | 0        | 0        | 0        |
| <i>Proteobacteria</i>                        | 275869               | 36                              | 2        | 2                           | 4         | 4         | 15         | 2        | 2        | 8        |
| <i>Spirochaetes</i>                          | 3563                 | 0                               | 0        | 0                           | 0         | 0         | 0          | 0        | 0        | 0        |
| <i>Synergistetes</i>                         | 944                  | 0                               | 0        | 0                           | 0         | 0         | 0          | 0        | 0        | 0        |
| <i>Tenericutes</i>                           | 2534                 | 0                               | 0        | 0                           | 0         | 0         | 0          | 0        | 0        | 0        |
| <i>Thermodesulfobacteria</i>                 | 116                  | 0                               | 0        | 0                           | 0         | 0         | 0          | 0        | 0        | 0        |
| <i>Thermotogae</i>                           | 528                  | 0                               | 0        | 0                           | 0         | 0         | 0          | 0        | 0        | 0        |
| <b>BRC1</b>                                  | 70                   | 0                               | 0        | 0                           | 0         | 0         | 0          | 0        | 0        | 0        |
| <b>OD1</b>                                   | 127                  | 0                               | 0        | 0                           | 0         | 0         | 0          | 0        | 0        | 0        |
| <b>OP11</b>                                  | 84                   | 0                               | 0        | 0                           | 0         | 0         | 0          | 0        | 0        | 0        |
| <b>SR1</b>                                   | 247                  | 0                               | 0        | 0                           | 0         | 0         | 0          | 0        | 0        | 0        |
| <b>Saccharibacteria</b>                      | 1650                 | 692                             | 1442     | 1541                        | 1311      | 1052      | 1308       | 1560     | 1564     | 1527     |
| <b>WS3</b>                                   | 135                  | 0                               | 0        | 0                           | 0         | 0         | 0          | 0        | 0        | 0        |
| <i>Armatimonadetes</i>                       | 528                  | 11                              | 0        | 0                           | 1         | 0         | 0          | 0        | 0        | 0        |
| <i>Verrucomicrobia</i>                       | 5263                 | 1                               | 1        | 0                           | 0         | 1         | 1          | 1        | 1        | 0        |
| <i>Acidobacteria</i>                         | 10124                | 0                               | 1        | 0                           | 0         | 0         | 0          | 1        | 1        | 0        |
| <i>Firmicutes</i>                            | 404557               | 4                               | 0        | 3                           | 6         | 4         | 4          | 3        | 1        | 3        |
| <i>Cyanobacteria/Chloroplast</i>             | 11341                | 0                               | 0        | 0                           | 0         | 0         | 0          | 0        | 0        | 0        |
| unclassified Bacteria                        | 17744                | 63                              | 6        | 7                           | 3         | 9         | 58         | 13       | 7        | 71       |
| <b>Total</b>                                 | 1032223              | 937                             | 1454     | 1554                        | 1334      | 1160      | 1395       | 1583     | 1579     | 1610     |
| <b>% Specificity</b>                         |                      | 73.9                            | 99.2     | 99.2                        | 99.8      | 90.7      | 93.8       | 98.5     | 99.1     | 94.8     |
| <b>% Saccharibacteria Accessions matched</b> |                      | 41.9                            | 87.4     | 93.4                        | 79.5      | 63.8      | 79.2       | 94.5     | 94.7     | 92.5     |

45  
 46  
 47  
 48

49 **Table S3. *In silico* matches is RDP to the new Saccharibacteria taxon-specific primer set.** The  
50 number of matches to accessions in each phylum in the RDP Release 10 Update 28 are reported,  
51 including those after 1 and 2 mismatches.

52

|                                                     | <b>Total number of accessions</b> | <b>0 mismatches</b> | <b>1 mismatch</b> | <b>2 mismatches</b> |
|-----------------------------------------------------|-----------------------------------|---------------------|-------------------|---------------------|
| <b>Domain <i>Bacteria</i></b>                       | 1235311                           | 1720                | 2097              | 11850               |
| <b><i>Actinobacteria</i></b>                        | 180827                            | 0                   | 0                 | 26                  |
| <b><i>Aquificae</i></b>                             | 945                               | 0                   | 0                 | 4                   |
| <b><i>Bacteroidetes</i></b>                         | 141057                            | 0                   | 0                 | 9                   |
| <b><i>Caldiserica</i></b>                           | 220                               | 0                   | 0                 | 0                   |
| <b><i>Chlamydiae</i></b>                            | 504                               | 0                   | 0                 | 0                   |
| <b><i>Chlorobi</i></b>                              | 1058                              | 0                   | 0                 | 0                   |
| <b><i>Chloroflexi</i></b>                           | 20447                             | 0                   | 0                 | 17                  |
| <b><i>Chrysiogenetes</i></b>                        | 12                                | 0                   | 0                 | 0                   |
| <b><i>Deferribacteres</i></b>                       | 378                               | 0                   | 0                 | 0                   |
| <b><i>Deinococcus-Thermus</i></b>                   | 1844                              | 0                   | 0                 | 0                   |
| <b><i>Dictyoglomi</i></b>                           | 22                                | 0                   | 0                 | 0                   |
| <b><i>Elusimicrobia</i></b>                         | 172                               | 0                   | 0                 | 0                   |
| <b><i>Fibrobacteres</i></b>                         | 308                               | 0                   | 0                 | 39                  |
| <b><i>Fusobacteria</i></b>                          | 9378                              | 0                   | 0                 | 0                   |
| <b><i>Gemmatimonadetes</i></b>                      | 1256                              | 0                   | 0                 | 0                   |
| <b><i>Lentisphaerae</i></b>                         | 1707                              | 0                   | 0                 | 0                   |
| <b><i>Nitrospira</i></b>                            | 1433                              | 0                   | 0                 | 0                   |
| <b><i>Planctomycetes</i></b>                        | 11233                             | 0                   | 0                 | 1                   |
| <b><i>Proteobacteria</i></b>                        | 341501                            | 0                   | 0                 | 9192                |
| <b><i>Spirochaetes</i></b>                          | 9606                              | 0                   | 0                 | 0                   |
| <b><i>Synergistetes</i></b>                         | 1120                              | 0                   | 0                 | 0                   |
| <b><i>Tenericutes</i></b>                           | 3214                              | 0                   | 0                 | 0                   |
| <b><i>Thermodesulfobacteria</i></b>                 | 107                               | 0                   | 0                 | 0                   |
| <b><i>Thermotogae</i></b>                           | 582                               | 0                   | 0                 | 0                   |
| <b>Candidate phylum BRC1</b>                        | 399                               | 0                   | 0                 | 0                   |
| <b>Candidate phylum OD1</b>                         | 153                               | 0                   | 0                 | 6                   |
| <b>Candidate phylum OP11</b>                        | 97                                | 0                   | 0                 | 0                   |
| <b>Candidate phylum SR1</b>                         | 234                               | 0                   | 0                 | 0                   |
| <b><i>Saccharibacteria</i></b>                      | 2167                              | 1719                | 2072              | 2092                |
| <b>Candidate phylum WS3</b>                         | 529                               | 0                   | 0                 | 0                   |
| <b><i>Armatimonadetes</i></b>                       | 1016                              | 0                   | 0                 | 2                   |
| <b><i>Verrucomicrobia</i></b>                       | 9586                              | 0                   | 0                 | 24                  |
| <b><i>Acidobacteria</i></b>                         | 14151                             | 0                   | 0                 | 99                  |
| <b><i>Firmicutes</i></b>                            | 420503                            | 0                   | 0                 | 6                   |
| <b><i>Cyanobacteria</i></b>                         | 21330                             | 0                   | 0                 | 70                  |
| <b>Unclassified <i>Bacteria</i></b>                 | 36214                             | 1                   | 25                | 263                 |
| <b><i>Archaea</i></b>                               | 23532                             | 0                   | 0                 | 0                   |
| <b>% <i>Saccharibacteria</i> sequences targeted</b> |                                   | <b>79.3</b>         | <b>95.6</b>       | <b>96.5</b>         |
